# Supplementary material for: Structure-dependent mercury sequestration and microbial methylation mediated by FeS nanoparticles in contaminated groundwater
Source: Royal Society of Chemistry journal article supplement (doi:10.1039/d5en00212e), 2025-01-01
Supplement: d5en00212e1.pdf [file d5en00212e1.pdf]

## Supporting Information

### **Structure-dependent mercury sequestration and microbial methylation mediated by FeS nanoparticles in contaminated groundwater**

Xiaoyu Huang<sup>a</sup>, Luyao Sun<sup>a</sup>, Xianjin Tang<sup>b</sup>, Yanyan Gong<sup>\*a</sup>

<sup>a</sup> *College of Environment and Climate, Guangdong Provincial Key Laboratory of Environmental Pollution and Health, Jinan University, Guangzhou 511443, China*

<sup>b</sup> *Zhejiang Provincial Key Laboratory of Agricultural Resources and Environment, College of Environmental and Resource Sciences, Zhejiang University, Hangzhou 310058, China*

\*Corresponding author. E-mail address: yanyangong@jnu.edu.cn (Y. Gong).

This supporting information includes 20 pages, 3 tables, and 9 figures.

## Contents

**Section S1.** Materials

**Section S2.** Preparation of CMC-FeS nanoparticles

**Section S3.** Hg speciation analysis, cell density, and viability of the PCA cells

**Section S4.** Simulation of Hg methylation rate constant and MeHg demethylation rate constant

**Table S1.** Chemical compositions of the NBAF medium

**Table S2.** Hyperfine parameters of Mössbauer spectra of Hg-CMC-FeS<sub>sorp</sub> and Hg-CMC-FeS<sub>cpt</sub>

**Table S3.** Simulated methylation rate constant  $k_m$  and demethylation rate  $k_d$  using a nonlinear reversible reaction model

**Figure S1.** SEM images of Hg-CMC-FeS<sub>sorp</sub>, Hg-CMC-FeS<sub>cpt</sub>, and Hg-CMC-FeS<sub>pre</sub>

**Figure S2.** SEM-mapping and EDS of Hg-CMC-FeS<sub>sorp</sub>, Hg-CMC-FeS<sub>cpt</sub>, and Hg-CMC-FeS<sub>pre</sub>

**Figure S3.** Mössbauer spectra of Hg-CMC-FeS<sub>sorp</sub> and Hg-CMC-FeS<sub>cpt</sub>

**Figure S4.** Linear relationship between Methylation rate constant ( $k_m$ ) and Demethylation rate constant ( $k_d$ )

**Figure S5.** Optical density (OD<sub>600</sub>) and activity of *G. sulfurreducens* PCA cultures exposed to Hg(II) after sorption, coprecipitation, and chemical precipitation with CMC-FeS

**Figure S6.** MeHg production by *G. sulfurreducens* PCA cultures exposed to different concentrations of dissolved mercury and MeHg production by *G. sulfurreducens* PCA cultures exposed to various concentrations of Hg in Hg-CMC-FeS<sub>cpt</sub>

**Figure S7.** Linear relationship between  $S^{2-}$  to  $Hg^{2+}$  molar ratios and Hg(II) removal efficiency

**Figure S8.** Dynamics of net mercury methylation by *G. sulfurreducens* PCA cultures exposed to Hg(II) before and after sorption, coprecipitation, and chemical precipitation with CMC-FeS at various  $S^{2-}$  to  $Hg^{2+}$  molar ratios

**Figure S9.** Optical density ( $OD_{600}$ ) of *G. sulfurreducens* PCA cultures exposed to Hg(II) after sorption, coprecipitation, and chemical precipitation with CMC-FeS

## Section S1. Materials

All reagents used in this study were of analytical grade or higher. Iron Sulfate heptahydrate ( $\text{FeSO}_4 \cdot 7\text{H}_2\text{O}$ ), sodium sulfide nonahydrate ( $\text{Na}_2\text{S} \cdot 9\text{H}_2\text{O}$ ), CMC (sodium salt, MW = 90000, degree of substitute = 0.7), mercury nitrate ( $\text{Hg}(\text{NO}_3)_2$ ), sodium sulfate ( $\text{Na}_2\text{SO}_4$ ), potassium phosphate dibasic solution ( $\text{K}_2\text{HPO}_4$ ), and potassium phosphate monobasic ( $\text{KH}_2\text{PO}_4$ ) were purchased from Jiangyang Global Reagent Technology (Taizhou, China). Sodium bicarbonate ( $\text{NaHCO}_3$ ) was obtained from Damao Chemical Reagent Technology (Tianjin, China). Calcium chloride anhydrous ( $\text{CaCl}_2$ ) and sodium chloride ( $\text{NaCl}$ ) were acquired from Guangzhou Chemical Reagent Technology (Guangzhou, China). Ascorbic acid, fumaric acid, magnesium sulfate hexahydrate ( $\text{MgSO}_4 \cdot 7\text{H}_2\text{O}$ ),  $\text{NaAc} \cdot 3\text{H}_2\text{O}$ , resazurin biotin, pantothenic acid, p-aminobenzoic acid, nicotinic acid, thiamine, riboflavin, pyridoxine HCl, and folic acid were obtained from Aladdin industrial corporation (Shanghai, China). Glacial acetic acid, sodium acetate, and cysteine were obtained from Sinopharm Chemical Reagent Corporation (Shanghai, China).  $\text{Hg}^{2+}$  stock solution ( $1000 \text{ mg L}^{-1}$ ) was prepared by dissolving  $\text{Hg}(\text{NO}_3)_2$  in 28 mM  $\text{HNO}_3$  solution.

## **Section S2. Preparation of CMC-FeS nanoparticles**

CMC-FeS nanoparticles were synthesized according to a previously reported approach by Gong et al.<sup>1</sup> In brief, a CMC solution was first prepared with deionized (DI) water. Then, a solution of FeSO<sub>4</sub> was added to the CMC solution under N<sub>2</sub> purging to form Fe<sup>2+</sup>-CMC complexes. Subsequently, a stoichiometric amount of Na<sub>2</sub>S solution was introduced into the solution drop-wise under shaking and N<sub>2</sub> purging. The resultant nanoparticle suspension contained 100 mg L<sup>-1</sup> FeS and 0.004% CMC. To ensure complete reaction and full growth of the nanoparticles, the suspension was sealed and aged for 24 h before use.

### Section S3. Hg speciation analysis, cell density, and viability of the PCA cells

At predetermined time intervals (10, 24, 96 h), a set of four vials were sampled for Hg species distributions on the cell and in the solution. First, all samples were immediately analyzed for purgeable element Hg(0) by purging dissolved gaseous Hg(0) from the mixture. Secondly, two purged samples were filtered through 0.22  $\mu\text{m}$  syringe filters (Jinteng Experimental Equipment Co., Ltd., Tian Jin, China) to remove cells, and the filtrate was analyzed for nonpurgeable soluble Hg ( $\text{Hg}_{\text{sol}}$ ) and soluble MeHg ( $\text{MeHg}_{\text{sol}}$ ). An aliquot from the other two purged samples was analyzed for total nonpurgeable Hg ( $\text{Hg}_{\text{NP}}$ ) and total MeHg ( $\text{MeHg}_{\text{total}}$ ). MeHg ( $\text{MeHg}_{\text{total}}$  and  $\text{MeHg}_{\text{sol}}$ ) samples were preserved in HCl (0.4% v/v) at 4°C until analysis. Hg samples ( $\text{Hg}_{\text{NP}}$  and  $\text{Hg}_{\text{sol}}$ ) samples were preserved in BrCl (5% v/v) at 4°C until analysis. Total Hg ( $\text{Hg}_{\text{T}}$ ) was calculated by the sum of Hg(0) and  $\text{Hg}_{\text{NP}}$ . The cell-associated nonpurgeable Hg ( $\text{Hg}_{\text{cell}}$ ) was determined by subtracting  $\text{Hg}_{\text{sol}}$  from  $\text{Hg}_{\text{NP}}$ , and similarly for the cell-associated MeHg ( $\text{MeHg}_{\text{cell}} = \text{MeHg}_{\text{Total}} - \text{MeHg}_{\text{sol}}$ ). The soluble and cell-associated inorganic Hg ( $\text{IHg}_{\text{sol}}$  or  $\text{IHg}_{\text{cell}}$ ) were calculated by the difference between nonpurgeable Hg and MeHg (i.e.,  $\text{IHg}_{\text{sol}} = \text{Hg}_{\text{sol}} - \text{MeHg}_{\text{sol}}$  and  $\text{IHg}_{\text{cell}} = \text{Hg}_{\text{cell}} - \text{MeHg}_{\text{cell}}$ ). The cell density was monitored by measuring the optical density ( $\text{OD}_{600}$ ) with a Microplate reader (Epoch2, BioTek, Winooski, VT, U.S.A.). The viability of the cells was determined via a confocal laser scanning microscopy (CLSM) (LSM800, Zeiss, Jena, Germany) and the ratio of cell viability/total cell number was calculated using software Image-Pro Plus 6.0.

#### Section S4. Simulation of Hg methylation rate constant and MeHg demethylation rate constant

**Eq. S1** describes the general kinetics for the Hg(II)-MeHg methylation-demethylation system, assuming pseudo first-order reactions for mercury methylation (described by the methylation rate constant,  $k_m$ ) and demethylation (described by the demethylation rate constant,  $k_d$ ):

$$\frac{d}{dt} \begin{bmatrix} [Hg(II)(t)] \\ [MeHg](t) \end{bmatrix} = \begin{bmatrix} -k_m & k_d \\ k_m & -k_d \end{bmatrix} \begin{bmatrix} [Hg(II)(t)] \\ [MeHg](t) \end{bmatrix} \quad (S1)$$

In this study, we solved **Eq. S1** and obtained the time-dependent concentration of MeHg (**Eq. S2**), which considered both demethylation and changes in MeHg and Hg(II) concentrations during the incubation.

$$\begin{aligned} [MeHg](t) = & \left( \frac{k_d}{k_m + k_d} e^{-(k_m + k_d)t} + \frac{k_m}{k_m + k_d} \right) [MeHg]_{t=0} \\ & + \left( \frac{k_d}{k_m + k_d} (1 - e^{-(k_m + k_d)t}) \right) [Hg(II)]_{t=0} \end{aligned} \quad (S2)$$

where  $[MeHg](t)$  is the concentration of MeHg (nM) at incubation time  $t$  (h),  $k_m$  represents methylation rate potential ( $h^{-1}$ ),  $k_d$  represents demethylation rate constant ( $h^{-1}$ ),  $[MeHg]_{t=0}$  is initial MeHg concentration (nM), and  $[Hg(II)]_{t=0}$  is initial concentration of inorganic Hg(II) (nM). In our study,  $[MeHg]_{t=0}$  was 0 and  $[Hg(II)]_{t=0}$  was 2991 nM. Therefore, **Eq. S2** was simplified to:

$$[MeHg](t) = 2991 \frac{k_m}{k_m + k_d} (1 - e^{-(k_m + k_d)t}) \quad (S3)$$

The fitting of  $[MeHg](t)$  vs.  $t$  was conducted using SigmaPlot 12.5 software.

**Table S1.** Chemical compositions of the NBAF medium.<sup>2, 3</sup>

|                     | Ingredient                                             | Content in 1 L         |
|---------------------|--------------------------------------------------------|------------------------|
| 100X NB Salts       | KH <sub>2</sub> PO <sub>4</sub>                        | 42 g                   |
|                     | K <sub>2</sub> HPO <sub>4</sub>                        | 22 g                   |
|                     | NH <sub>4</sub> Cl                                     | 20 g                   |
|                     | KCl                                                    | 38 g                   |
|                     | NaCl                                                   | 36 g                   |
| NB Mineral Elixir   | Nitrilotriacetic acid                                  | 2.14 g                 |
|                     | MnCl <sub>2</sub> ·4H <sub>2</sub> O                   | 0.1 g                  |
|                     | FeSO <sub>4</sub> ·7H <sub>2</sub> O                   | 0.3 g                  |
|                     | CoCl <sub>2</sub> ·6H <sub>2</sub> O                   | 0.17 g                 |
|                     | ZnSO <sub>4</sub> ·7H <sub>2</sub> O                   | 0.2 g                  |
|                     | CuCl <sub>2</sub> ·2H <sub>2</sub> O                   | 0.03 g                 |
|                     | AlK(SO <sub>4</sub> ) <sub>2</sub> ·12H <sub>2</sub> O | 0.005 g                |
|                     | H <sub>3</sub> BO <sub>3</sub>                         | 0.005 g                |
|                     | Na <sub>2</sub> MoO <sub>4</sub> ·2H <sub>2</sub> O    | 0.09 g                 |
|                     | NiSO <sub>4</sub> ·6H <sub>2</sub> O                   | 0.11 g                 |
|                     | Na <sub>2</sub> WO <sub>4</sub> ·2H <sub>2</sub> O     | 0.02 g                 |
| DL Vitamins         | Biotin                                                 | 0.002 g                |
|                     | Pantothenic Acid                                       | 0.005 g                |
|                     | B-12                                                   | 0.0001 g               |
|                     | <i>p</i> -aminobenzoic acid                            | 0.005 g                |
|                     | Thioctic Acid                                          | 0.005 g                |
|                     | Nicotinic Acid                                         | 0.005 g                |
|                     | Thiamine                                               | 0.005 g                |
|                     | Riboflavin                                             | 0.005 g                |
|                     | Pyridoxine HCl                                         | 0.01 g                 |
| Medium compositions | Folic Acid                                             | 0.002 g                |
|                     | Fumarate                                               | 4.64 g                 |
|                     | 100X NB Salts                                          | 10 mL                  |
|                     | NB Mineral Elixir                                      | 10 mL                  |
|                     | DL vitamins                                            | 15 mL                  |
|                     | CaCl <sub>2</sub> ·2H <sub>2</sub> O                   | 0.04 g L <sup>-1</sup> |
|                     | MgSO <sub>4</sub> ·7H <sub>2</sub> O                   | 0.10 g                 |
|                     | NaHCO <sub>3</sub>                                     | 1.80 g                 |
|                     | Na <sub>2</sub> CO <sub>3</sub>                        | 0.43 g                 |
|                     | 1 mM Na <sub>2</sub> SeO <sub>4</sub>                  | 1.0 mL                 |
|                     | Na Acetate·H <sub>2</sub> O                            | 2.04 g                 |
|                     | Final pH adjusted to 7.0                               |                        |



**Table S2.** Hyperfine parameters of Mössbauer spectra of Hg-CMC-FeS<sub>sorp</sub> and Hg-CMC-FeS<sub>cpt</sub>.

| Sample                     | Isomer shift<br>(mm s <sup>-1</sup> ) | Quadrupole splitting<br>(mm s <sup>-1</sup> ) | Full width at half<br>maximum (mm s <sup>-1</sup> ) | Area (%) |
|----------------------------|---------------------------------------|-----------------------------------------------|-----------------------------------------------------|----------|
| Hg-CMC-FeS <sub>sorp</sub> | 0.34                                  | 0.73                                          | 0.23                                                | 100      |
| Hg-CMC-FeS <sub>cpt</sub>  | 0.35                                  | 0.75                                          | 0.23                                                | 100      |

**Table S3.** Simulated methylation rate constant  $k_m$  and demethylation rate  $k_d$  using a nonlinear reversible reaction model

| Sample                                                                                                             |                                                     | Methylation rate<br>constant, $k_m$ ( $\text{h}^{-1}$ ) | SD                    | Demethylation rate<br>constant, $k_d$ ( $\text{h}^{-1}$ ) | SD                    | $R^2$ |
|--------------------------------------------------------------------------------------------------------------------|-----------------------------------------------------|---------------------------------------------------------|-----------------------|-----------------------------------------------------------|-----------------------|-------|
| Various Hg forms                                                                                                   | Hg(II)                                              | $2.23 \times 10^{-3}$                                   | $1.08 \times 10^{-5}$ | $1.01 \times 10^{-1}$                                     | $1.49 \times 10^{-2}$ | 0.987 |
|                                                                                                                    | Hg(II) after sorption<br>with CMC-FeS               | $1.12 \times 10^{-3}$                                   | $9.17 \times 10^{-6}$ | $7.28 \times 10^{-2}$                                     | $1.30 \times 10^{-2}$ | 0.970 |
|                                                                                                                    | Hg(II) after coprecipitation<br>with CMC-FeS        | $1.49 \times 10^{-3}$                                   | $3.85 \times 10^{-6}$ | $8.92 \times 10^{-2}$                                     | $8.99 \times 10^{-3}$ | 0.989 |
|                                                                                                                    | Hg(II) after chemical precipitation<br>with CMC-FeS | $1.76 \times 10^{-3}$                                   | $8.26 \times 10^{-6}$ | $8.99 \times 10^{-2}$                                     | $1.39 \times 10^{-2}$ | 0.983 |
| Particulate Hg phase                                                                                               | Hg-CMC-FeS <sub>sorp</sub>                          | $2.39 \times 10^{-4}$                                   | $4.07 \times 10^{-7}$ | $5.17 \times 10^{-2}$                                     | $4.00 \times 10^{-3}$ | 0.996 |
|                                                                                                                    | Hg-CMC-FeS <sub>cpt</sub>                           | $4.08 \times 10^{-4}$                                   | $2.02 \times 10^{-6}$ | $6.15 \times 10^{-2}$                                     | $7.99 \times 10^{-3}$ | 0.985 |
|                                                                                                                    | Hg-CMC-FeS <sub>pre</sub>                           | $2.77 \times 10^{-4}$                                   | $2.24 \times 10^{-6}$ | $6.47 \times 10^{-2}$                                     | $1.09 \times 10^{-2}$ | 0.976 |
| Hg(II) after sorption with CMC-FeS<br>at various $\text{S}^{2-}$ to $\text{Hg}^{2+}$ molar ratios                  | 0.068:1                                             | $1.51 \times 10^{-3}$                                   | $3.54 \times 10^{-6}$ | $8.54 \times 10^{-2}$                                     | $6.99 \times 10^{-3}$ | 0.966 |
|                                                                                                                    | 0.23:1                                              | $1.34 \times 10^{-3}$                                   | $3.71 \times 10^{-6}$ | $8.06 \times 10^{-2}$                                     | $6.70 \times 10^{-3}$ | 0.979 |
|                                                                                                                    | 0.57:1                                              | $1.12 \times 10^{-3}$                                   | $1.05 \times 10^{-5}$ | $7.28 \times 10^{-2}$                                     | $1.39 \times 10^{-2}$ | 0.909 |
| Hg(II) after coprecipitation<br>with CMC-FeS at various<br>$\text{S}^{2-}$ to $\text{Hg}^{2+}$ molar ratios        | 0.068:1                                             | $1.98 \times 10^{-3}$                                   | $1.16 \times 10^{-6}$ | $1.00 \times 10^{-1}$                                     | $1.39 \times 10^{-2}$ | 0.972 |
|                                                                                                                    | 0.23:1                                              | $1.75 \times 10^{-3}$                                   | $1.15 \times 10^{-5}$ | $9.62 \times 10^{-2}$                                     | $1.49 \times 10^{-2}$ | 0.971 |
|                                                                                                                    | 0.57:1                                              | $1.52 \times 10^{-3}$                                   | $8.27 \times 10^{-6}$ | $9.14 \times 10^{-2}$                                     | $1.39 \times 10^{-2}$ | 0.937 |
| Hg(II) after chemical precipitation<br>with CMC-FeS at various<br>$\text{S}^{2-}$ to $\text{Hg}^{2+}$ molar ratios | 0.068:1                                             | $2.28 \times 10^{-3}$                                   | $3.67 \times 10^{-6}$ | $1.03 \times 10^{-1}$                                     | $6.99 \times 10^{-3}$ | 0.992 |
|                                                                                                                    | 0.23:1                                              | $2.02 \times 10^{-3}$                                   | $1.32 \times 10^{-6}$ | $9.59 \times 10^{-2}$                                     | $3.99 \times 10^{-3}$ | 0.997 |
|                                                                                                                    | 0.57:1                                              | $1.78 \times 10^{-3}$                                   | $7.77 \times 10^{-6}$ | $8.82 \times 10^{-2}$                                     | $9.99 \times 10^{-3}$ | 0.980 |

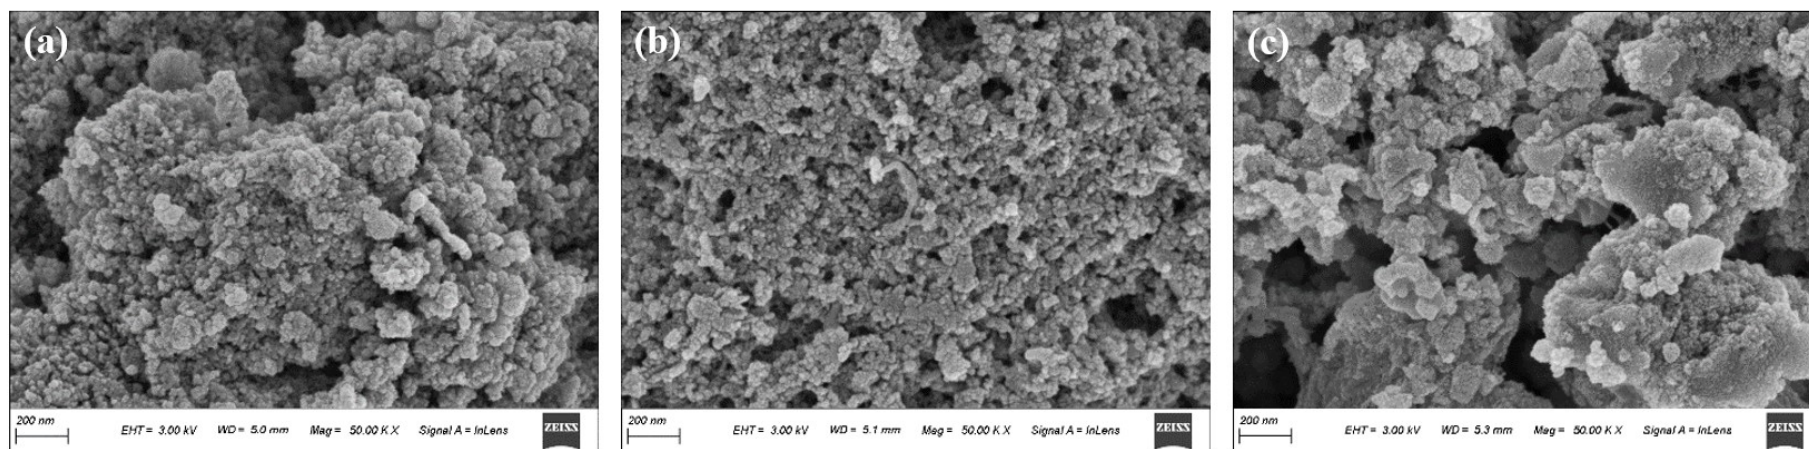

**Figure S1.** SEM images of (a) Hg-CMC-FeS<sub>sorp</sub>, (b) Hg-CMC-FeS<sub>cpt</sub>, and (c) Hg-CMC-FeS<sub>pre</sub>.

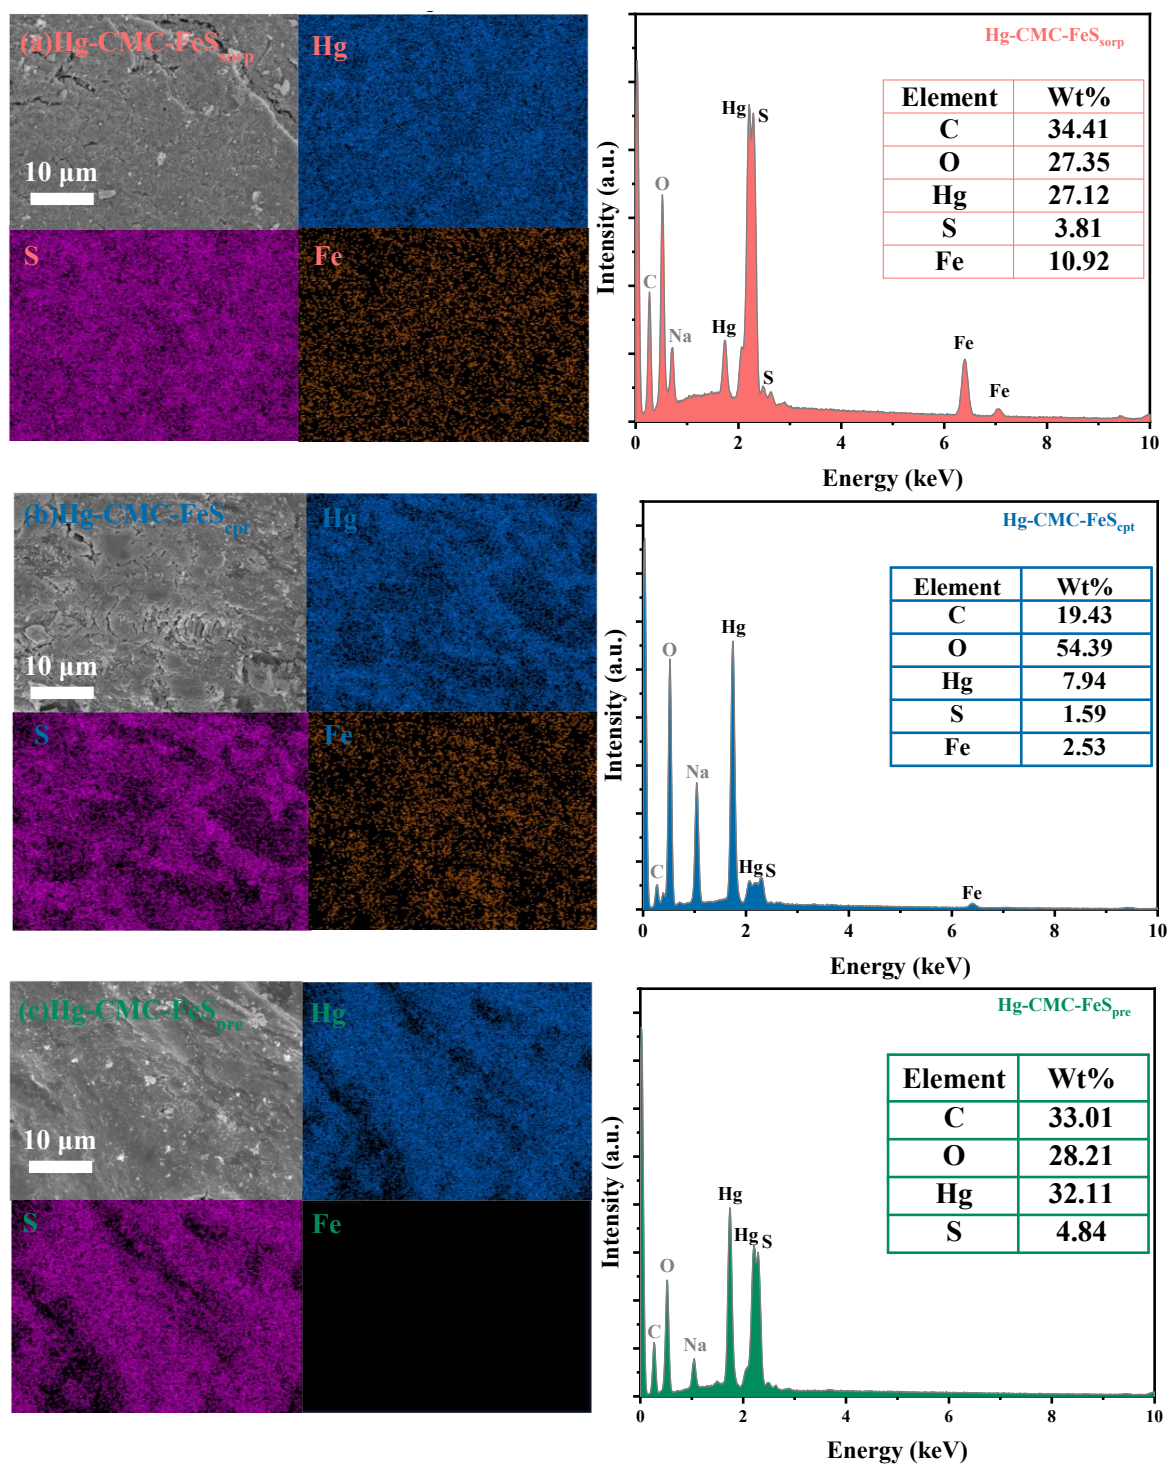

**Figure S2.** SEM-mapping and EDS of (a)  $\text{Hg-CMC-FeS}_{\text{sorp}}$ , (b)  $\text{Hg-CMC-FeS}_{\text{cpt}}$ , and (c)  $\text{Hg-CMC-FeS}_{\text{pre}}$ .

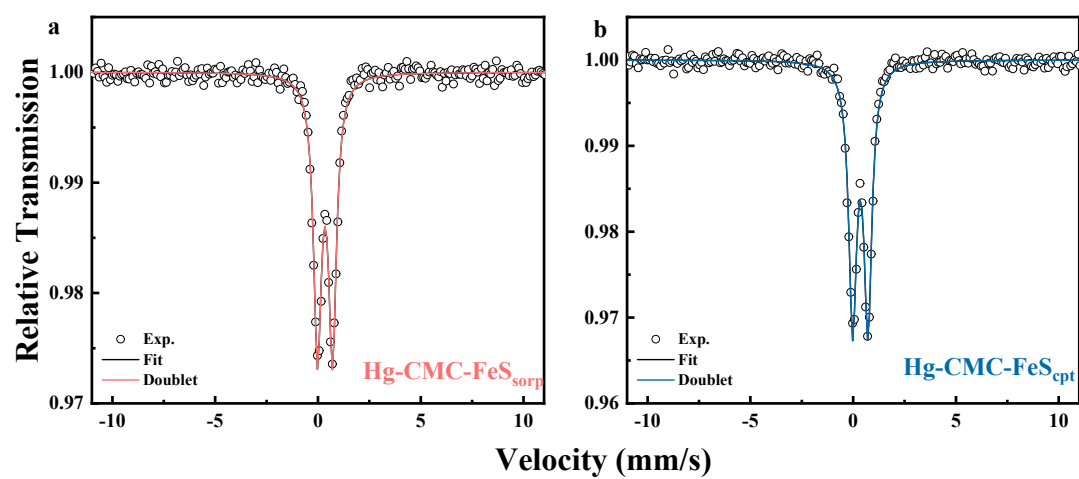

**Figure S3.** Mössbauer spectra of (a) Hg-CMC-FeS<sub>sorp</sub> and (b) Hg-CMC-FeS<sub>cpt</sub>.

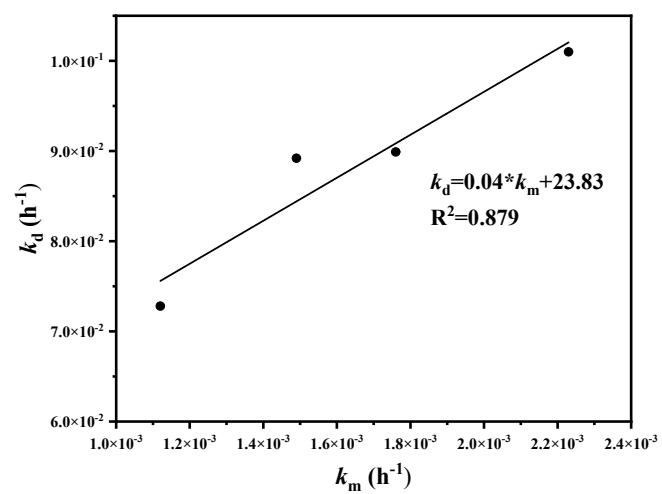

**Figure S4.** Linear relationship between methylation rate constant ( $k_m$ ) and demethylation rate constant ( $k_d$ ).

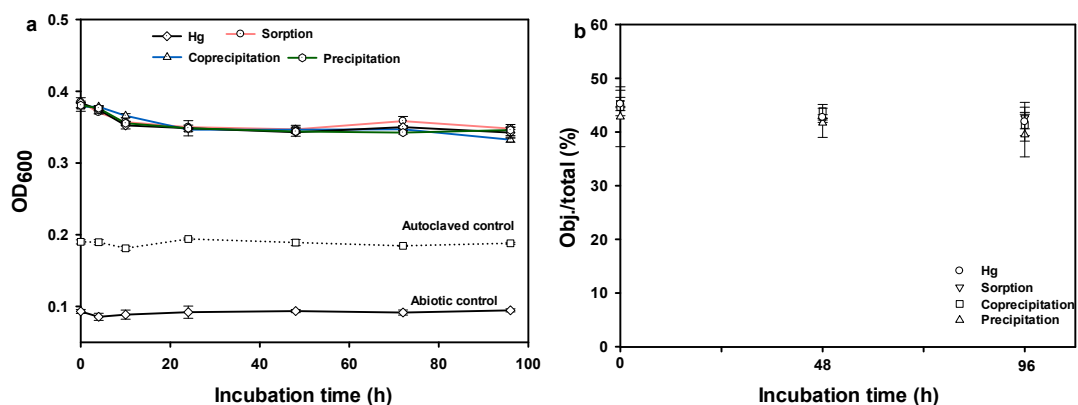

**Figure S5.** (a) Optical density (OD<sub>600</sub>) and (b) activity of *G. sulfurreducens* PCA cultures exposed to Hg(II) after sorption, coprecipitation, and chemical precipitation with CMC-FeS. Hg(II) = 600  $\mu\text{g L}^{-1}$ , CMC-FeS = 150  $\mu\text{g L}^{-1}$ , pH = 7.0 $\pm$ 0.2, and incubation time = 0-96 h. Data plotted as mean of duplicates and error bars (calculated as standard deviation) indicate data reproducibility.

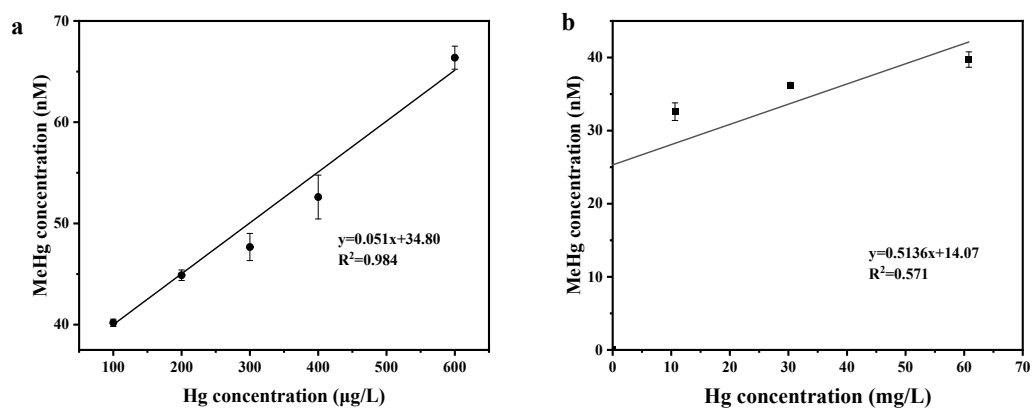

**Figure S6.** (a) MeHg production by *G. sulfurreducens* PCA cultures exposed to different concentrations of dissolved mercury and (b) MeHg production by *G. sulfurreducens* PCA cultures exposed to various concentrations of Hg in Hg-CMC-FeS<sub>cpt</sub>. Data plotted as mean of duplicates and error bars (calculated as standard deviation) indicate data reproducibility.



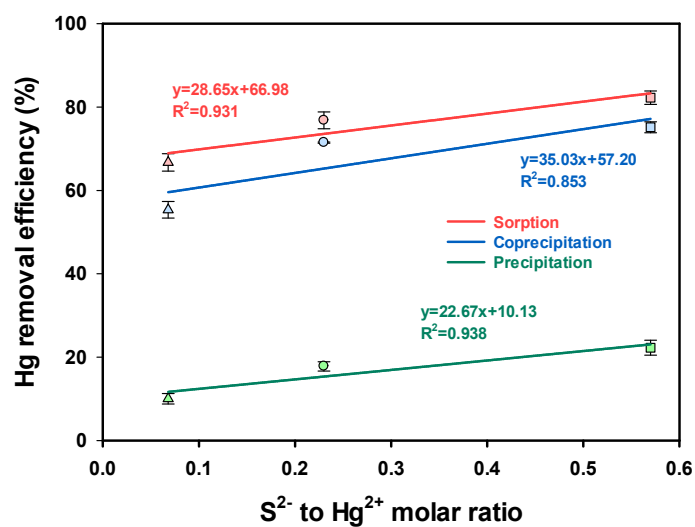

**Figure S7.** Linear relationship between S<sup>2-</sup> to Hg<sup>2+</sup> molar ratios and Hg(II) removal efficiency via sorption, coprecipitation, and precipitation with CMC-FeS. Hg(II) = 600 µg L<sup>-1</sup>, S<sup>2-</sup> to Hg<sup>2+</sup> molar ratios = 0.068:1, 0.23:1 and 0.57:1, pH = 8.7±0.2, and reaction time = 48 h. Data plotted as mean of duplicates and error bars (calculated as standard deviation) indicate data reproducibility.

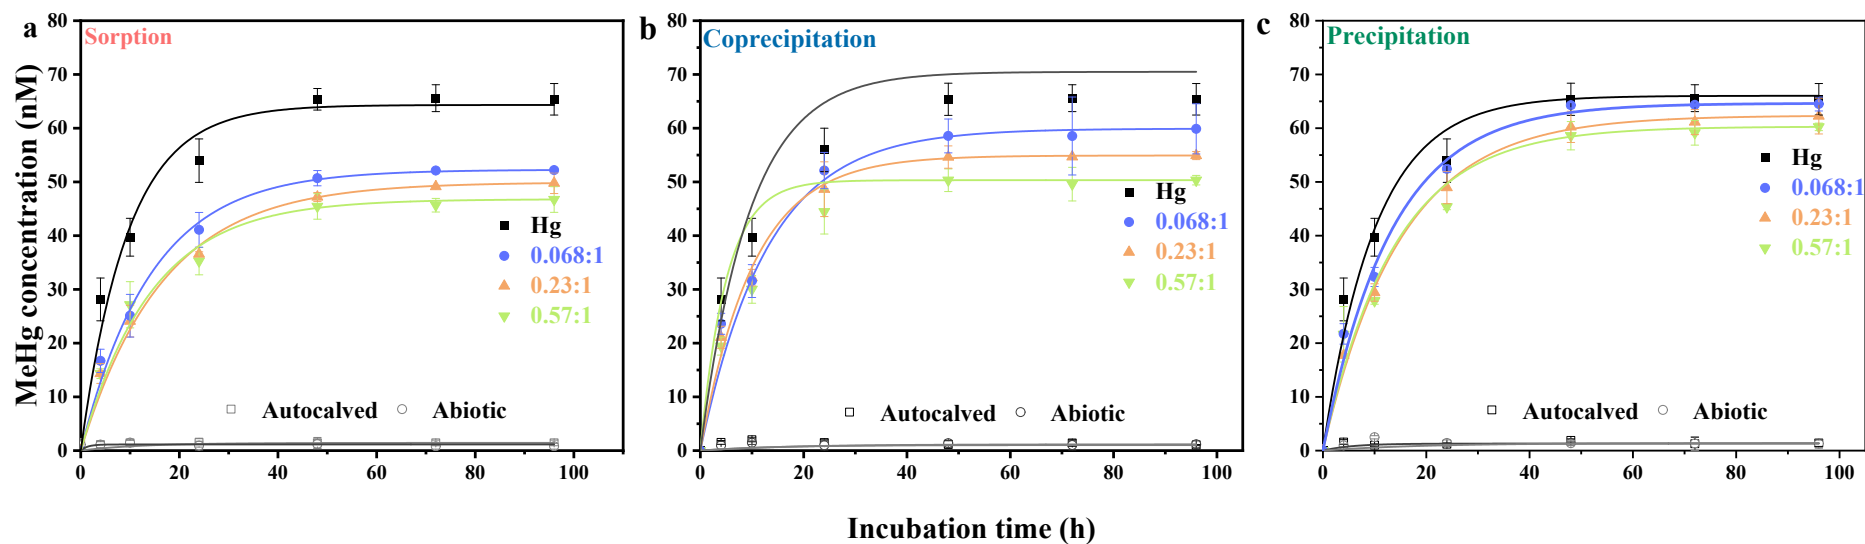

**Figure S8.** Dynamics of net mercury methylation by *G. sulfurreducens* PCA cultures exposed to Hg(II) before and after sorption, coprecipitation, and chemical precipitation with CMC-FeS at various  $S^{2-}$  to  $Hg^{2+}$  molar ratios. Hg = 600  $\mu\text{g L}^{-1}$ , pH =  $7.0 \pm 0.2$ , and incubation time = 0-96 h.

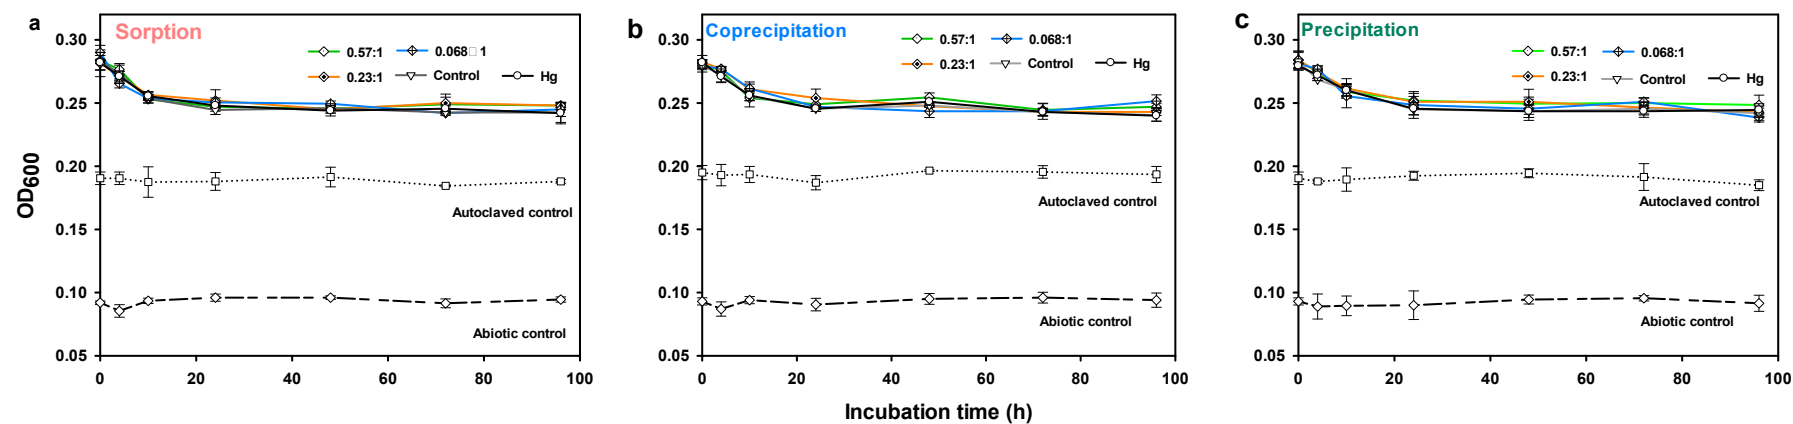

**Figure S9.** Optical density (OD<sub>600</sub>) of *G. sulfurreducens* PCA cultures exposed to Hg(II) after (a) sorption, (b) coprecipitation, and (c) chemical precipitation with CMC-FeS. Hg= 600  $\mu\text{g L}^{-1}$ , S<sup>2-</sup> to Hg<sup>2+</sup> molar ratios = 0.068, 0.23, and 0.57, pH = 7.0 $\pm$ 0.2, and incubation time = 0-96 h. Data plotted as mean of duplicates and error bars (calculated as standard deviation) indicate data reproducibility.

- 1 Y. Gong, Y. Liu, Z. Xiong, D. Zhao, Immobilization of mercury by carboxymethyl cellulose stabilized iron sulfide nanoparticles: Reaction mechanisms and effects of stabilizer and water chemistry, *Environ. Sci. Technol.*, 2014, **48**, 3986-3994.
- 2 C. Liu, D. Guo, S. Wen, Y. Dang, D. Sun, P. Li, Transcriptomic insights unveil the crucial roles of cytochromes, NADH, and pili in Ag (I) reduction by *Geobacter sulfurreducens*, *Chemosphere*, 2024, **358**, 142174.
- 3 H. Muhamadali, Y. Xu, D. I. Ellis, J. W. Allwood, N. W. Rattray, E. Correa, H. Alrabiah, J.R. Lloyd, R. Goodacre, Metabolic profiling of *Geobacter sulfurreducens* during industrial bioprocess scale-up, *Applied and Environmental Microbiology*, 2015, **81**, 3288-3298.
